# Supplementary material for: Perfect mimicry between Heliconius butterflies is constrained by genetics and development
Source: PubMed Central journal article supplement (PMC7423669; doi:10.1098/rspb.2020.1267), 2020-07-22
Supplement: rspb20201267supp5.pdf [file rspb20201267supp5.pdf]

**Table S 1. Summary of sampled images of each *H. erato* and *H. melpomene* race. Symbols are as in main Figure 2.**

| <b><i>H. erato</i></b> |                                  |                                                                                   |     | <b><i>H. melpomene</i></b> |               |                                                                                     |     |
|------------------------|----------------------------------|-----------------------------------------------------------------------------------|-----|----------------------------|---------------|-------------------------------------------------------------------------------------|-----|
| Race                   | Location                         | Symbol                                                                            | #   | Race                       | Location      | Symbol                                                                              | #   |
| <i>H. e. hydara</i>    | Panama                           |  | 10  | <i>H. m. melpomene</i>     | Panama        |  | 8   |
| <i>H. e. hydara</i>    | French Guiana                    |  | 10  | <i>H. m. melpomene</i>     | French Guiana |  | 9   |
| <i>H. e. demophoon</i> | Panama                           |  | 11  | <i>H. m. rosina</i>        | Panama        |  | 10  |
| <i>H. e. venus</i>     | Colombia                         |  | 10  | <i>H. m. vulcanus</i>      | Colombia      |  | 10  |
| <i>H. e. cyrbia</i>    | Ecuador                          |  | 10  | <i>H. m. cythera</i>       | Ecuador       |  | 10  |
| <i>H. e. lativitta</i> | Ecuador                          |  | 10  | <i>H. m. malleti</i>       | Ecuador       |  | 11  |
| <i>H. e. emma</i>      | Peru                             |  | 10  | <i>H. m. aglaope</i>       | Peru          |  | 13  |
| <i>H. e. notabilis</i> | Ecuador                          |  | 10  | <i>H. m. plesseni</i>      | Ecuador       |  | 10  |
| <i>H. e. etylus</i>    | Ecuador                          |  | 10  | <i>H. m. ecuadorensis</i>  | Ecuador       |  | 9   |
| <i>H. e. favorinus</i> | Peru                             |  | 9   | <i>H. m. amaryllis</i>     | Peru          |  | 11  |
| <i>H. e. phyllis</i>   | Brazil                           |  | 10  | <i>H. m. nanna</i>         | Brazil        |  | 10  |
| <i>H. e. amalfreda</i> | French Guiana                    |  | 10  | <i>H. m. meriana</i>       | French Guiana |  | 8   |
| <i>H. e. microclea</i> | Peru                             |  | 10  | <i>H. m. xenoclea</i>      | Peru          |  | 8   |
| <i>H. e. erato</i>     | Brazil, Panama,<br>French Guiana |  | 10  | <i>H. m. thelxiopeia</i>   | French Guiana |  | 14  |
| Total                  |                                  |                                                                                   | 140 | Total                      |               |                                                                                     | 141 |
