# Supplementary material for: Perfect mimicry between Heliconius butterflies is constrained by genetics and development
Source: PubMed Central journal article supplement (PMC7423669; doi:10.1098/rspb.2020.1267), 2020-07-22
Supplement: rspb20201267supp6.pdf [file rspb20201267supp6.pdf]

**Table S 2. Sample ID, sex and localities.** Images can be downloaded from [https://github.com/patternize-projects/Heliconius\\_forewing\\_band](https://github.com/patternize-projects/Heliconius_forewing_band).

| Species         | Race             | Image-ID  | Sex | Latitude  | Longitude  | Location |
|-----------------|------------------|-----------|-----|-----------|------------|----------|
| <i>H. erato</i> | <i>amalfreda</i> | BC2108    | m   | 4.941100  | -55.182000 | Suriname |
| <i>H. erato</i> | <i>amalfreda</i> | BC2146    | m   | 4.958700  | -55.179000 | Suriname |
| <i>H. erato</i> | <i>amalfreda</i> | BC2168    | f   | 4.943490  | -55.186000 | Suriname |
| <i>H. erato</i> | <i>amalfreda</i> | BC2181    | m   | 4.940650  | -55.190000 | Suriname |
| <i>H. erato</i> | <i>amalfreda</i> | BC2184    | f   | 4.940650  | -55.190000 | Suriname |
| <i>H. erato</i> | <i>amalfreda</i> | BC2187    | m   | 4.938030  | -55.194000 | Suriname |
| <i>H. erato</i> | <i>amalfreda</i> | BC2193    | f   | 4.932730  | -55.201000 | Suriname |
| <i>H. erato</i> | <i>amalfreda</i> | BC2223    | f   | 5.261830  | -55.622000 | Suriname |
| <i>H. erato</i> | <i>amalfreda</i> | BC2227    | m   | 5.234000  | -55.775000 | Suriname |
| <i>H. erato</i> | <i>amalfreda</i> | BC2351    | f   | 4.983940  | -55.156000 | Suriname |
| <i>H. erato</i> | <i>cyrbia</i>    | CAM040321 | m   | -0.052370 | -78.766000 | Ecuador  |
| <i>H. erato</i> | <i>cyrbia</i>    | CAM040354 | m   | 0.207730  | -78.946910 | Ecuador  |
| <i>H. erato</i> | <i>cyrbia</i>    | CAM040355 | m   | 0.207730  | -78.946910 | Ecuador  |
| <i>H. erato</i> | <i>cyrbia</i>    | CAM040356 | m   | 0.207730  | -78.946910 | Ecuador  |
| <i>H. erato</i> | <i>cyrbia</i>    | CAM040357 | m   | 0.207730  | -78.946910 | Ecuador  |
| <i>H. erato</i> | <i>cyrbia</i>    | CAM040361 | f   | -0.052370 | -78.766000 | Ecuador  |
| <i>H. erato</i> | <i>cyrbia</i>    | CAM040362 | m   | 0.140570  | -78.763030 | Ecuador  |
| <i>H. erato</i> | <i>cyrbia</i>    | CAM040363 | m   | 0.140570  | -78.763030 | Ecuador  |
| <i>H. erato</i> | <i>cyrbia</i>    | CAM040364 | m   | 0.140570  | -78.763030 | Ecuador  |
| <i>H. erato</i> | <i>cyrbia</i>    | CAM040365 | m   | 0.140570  | -78.763030 | Ecuador  |
| <i>H. erato</i> | <i>demophoon</i> | IMG_1960  | f   | 9.166333  | -79.2079   | Panama   |
| <i>H. erato</i> | <i>demophoon</i> | IMG_1972  | f   | 9.166333  | -79.2079   | Panama   |
| <i>H. erato</i> | <i>demophoon</i> | IMG_1974  | f   | 9.166333  | -79.2079   | Panama   |
| <i>H. erato</i> | <i>demophoon</i> | IMG_1978  | m   | 9.2074    | -78.8265   | Panama   |
| <i>H. erato</i> | <i>demophoon</i> | IMG_1980  | m   | 9.2074    | -78.8265   | Panama   |
| <i>H. erato</i> | <i>demophoon</i> | IMG_1982  | m   | 9.2074    | -78.8265   | Panama   |
| <i>H. erato</i> | <i>demophoon</i> | IMG_1987  | f   | 9.2074    | -78.8265   | Panama   |
| <i>H. erato</i> | <i>demophoon</i> | IMG_2049  | m   | 9.2481    | -79.9478   | Panama   |
| <i>H. erato</i> | <i>demophoon</i> | IMG_2125  | m   | 9.11605   | -79.6984   | Panama   |
| <i>H. erato</i> | <i>demophoon</i> | IMG_2135  | m   | 9.11605   | -79.6984   | Panama   |
| <i>H. erato</i> | <i>demophoon</i> | IMG_2141  | m   | 9.11605   | -79.6984   | Panama   |
| <i>H. erato</i> | <i>emma</i>      | 10429077  | m   | -1.583333 | -77.750000 | Ecuador  |
| <i>H. erato</i> | <i>emma</i>      | 10429078  | m   | -1.583333 | -77.750000 | Ecuador  |
| <i>H. erato</i> | <i>emma</i>      | BC2563    | f   | -5.29499  | -78.381    | Peru     |
| <i>H. erato</i> | <i>emma</i>      | BC2578    | m   | -5.29499  | -78.381    | Peru     |
| <i>H. erato</i> | <i>emma</i>      | BC2579    | m   | -5.29499  | -78.381    | Peru     |
| <i>H. erato</i> | <i>emma</i>      | BC2580    | m   | -5.29499  | -78.381    | Peru     |
| <i>H. erato</i> | <i>emma</i>      | BC2611    | f   | -5.38852  | -78.45114  | Peru     |
| <i>H. erato</i> | <i>emma</i>      | BC2612    | m   | -5.38852  | -78.45114  | Peru     |
| <i>H. erato</i> | <i>emma</i>      | BC2620    | m   | -5.37967  | -78.45478  | Peru     |

|                 |                  |          |   |           |            |               |
|-----------------|------------------|----------|---|-----------|------------|---------------|
| <i>H. erato</i> | <i>emma</i>      | BC2624   | m | -5.44466  | -78.48361  | Peru          |
| <i>H. erato</i> | <i>erato</i>     | BC0147   | f | 4.622068  | -52.376361 | French Guiana |
| <i>H. erato</i> | <i>erato</i>     | BC0148   | m | 4.556676  | -52.182277 | French Guiana |
| <i>H. erato</i> | <i>erato</i>     | BC0149   | m | 4.607970  | -52.272347 | French Guiana |
| <i>H. erato</i> | <i>erato</i>     | BC0154   | m | 4.563718  | -52.206697 | French Guiana |
| <i>H. erato</i> | <i>erato</i>     | BC0163   | m | 4.568734  | -52.211198 | French Guiana |
| <i>H. erato</i> | <i>erato</i>     | BC0198   | m | 4.570132  | -52.214164 | French Guiana |
| <i>H. erato</i> | <i>erato</i>     | BC0200   | m | 4.564127  | -52.207655 | French Guiana |
| <i>H. erato</i> | <i>erato</i>     | BC0327   | m | 4.638617  | -52.301596 | French Guiana |
| <i>H. erato</i> | <i>erato</i>     | BC0340   | m | 4.570132  | -52.214164 | French Guiana |
| <i>H. erato</i> | <i>erato</i>     | BC0351   | m | 4.548767  | -52.145497 | French Guiana |
| <i>H. erato</i> | <i>etylus</i>    | 10429064 | m | 15.290278 | -89.146389 | Guatemala     |
| <i>H. erato</i> | <i>etylus</i>    | 10429062 | m | -1.583333 | -77.750000 | Ecuador       |
| <i>H. erato</i> | <i>etylus</i>    | BC3000   | f | -2.27322  | -78.19147  | Ecuador       |
| <i>H. erato</i> | <i>etylus</i>    | BC3001   | m | -2.27322  | -78.19147  | Ecuador       |
| <i>H. erato</i> | <i>etylus</i>    | BC3002   | m | -2.27322  | -78.19147  | Ecuador       |
| <i>H. erato</i> | <i>etylus</i>    | BC3003   | f | -2.27322  | -78.19147  | Ecuador       |
| <i>H. erato</i> | <i>etylus</i>    | BC3006   | f | -2.20024  | -78.15775  | Ecuador       |
| <i>H. erato</i> | <i>etylus</i>    | BC3007   | m | -2.20024  | -78.15775  | Ecuador       |
| <i>H. erato</i> | <i>etylus</i>    | BC3009   | f | -2.20024  | -78.15775  | Ecuador       |
| <i>H. erato</i> | <i>etylus</i>    | BC3010   | f | -2.20024  | -78.15775  | Ecuador       |
| <i>H. erato</i> | <i>favorinus</i> | 10428999 | m | -9.300000 | -76.000000 | Peru          |
| <i>H. erato</i> | <i>favorinus</i> | BC2634   | m | -6.4174   | -77.44329  | Peru          |
| <i>H. erato</i> | <i>favorinus</i> | BC2635   | f | -6.4174   | -77.44329  | Peru          |
| <i>H. erato</i> | <i>favorinus</i> | BC2636   | m | -6.4174   | -77.44329  | Peru          |
| <i>H. erato</i> | <i>favorinus</i> | BC2637   | m | -6.4174   | -77.44329  | Peru          |
| <i>H. erato</i> | <i>favorinus</i> | BC2638   | m | -6.4174   | -77.44329  | Peru          |
| <i>H. erato</i> | <i>favorinus</i> | BC2640   | m | -6.4174   | -77.44329  | Peru          |
| <i>H. erato</i> | <i>favorinus</i> | BC2643   | f | -6.41388  | -77.44505  | Peru          |
| <i>H. erato</i> | <i>favorinus</i> | BC2646   | m | -6.41388  | -77.44505  | Peru          |
| <i>H. erato</i> | <i>hyدارا</i>    | BC0004   | m | 4.796800  | -52.324517 | French Guiana |
| <i>H. erato</i> | <i>hyدارا</i>    | BC0049   | m | 4.796800  | -52.324517 | French Guiana |
| <i>H. erato</i> | <i>hyدارا</i>    | BC0050   | m | 4.845894  | -52.348475 | French Guiana |
| <i>H. erato</i> | <i>hyدارا</i>    | BC0061   | f | 4.549374  | -52.147880 | French Guiana |
| <i>H. erato</i> | <i>hyدارا</i>    | BC0071   | m | 4.548767  | -52.145497 | French Guiana |
| <i>H. erato</i> | <i>hyدارا</i>    | BC0076   | f | 4.796800  | -52.324517 | French Guiana |
| <i>H. erato</i> | <i>hyدارا</i>    | BC0077   | m | 4.796800  | -52.324517 | French Guiana |
| <i>H. erato</i> | <i>hyدارا</i>    | BC0079   | m | 4.796800  | -52.324517 | French Guiana |
| <i>H. erato</i> | <i>hyدارا</i>    | BC0082   | m | 4.926844  | -52.390483 | French Guiana |
| <i>H. erato</i> | <i>hyدارا</i>    | BC0125   | m | 4.616785  | -52.283083 | French Guiana |
| <i>H. erato</i> | <i>hyدارا</i>    | IMG_1855 | m | 8.972917  | -78.5106   | Panama        |
| <i>H. erato</i> | <i>hyدارا</i>    | IMG_1861 | m | 8.972917  | -78.5106   | Panama        |
| <i>H. erato</i> | <i>hyدارا</i>    | IMG_1859 | m | 8.972917  | -78.5106   | Panama        |
| <i>H. erato</i> | <i>hyدارا</i>    | IMG_1863 | f | 8.950117  | -78.4496   | Panama        |

|                 |                  |           |   |            |            |         |
|-----------------|------------------|-----------|---|------------|------------|---------|
| <i>H. erato</i> | <i>hydara</i>    | IMG_1869  | m | 8.950117   | -78.4496   | Panama  |
| <i>H. erato</i> | <i>hydara</i>    | IMG_1871  | f | 8.972917   | -78.5106   | Panama  |
| <i>H. erato</i> | <i>hydara</i>    | IMG_1877  | m | 8.952533   | -78.5251   | Panama  |
| <i>H. erato</i> | <i>hydara</i>    | IMG_1885  | f | 8.972917   | -78.5106   | Panama  |
| <i>H. erato</i> | <i>hydara</i>    | IMG_1899  | m | 8.950117   | -78.4496   | Panama  |
| <i>H. erato</i> | <i>hydara</i>    | IMG_1993  | f | 9.2074     | -78.8265   | Panama  |
| <i>H. erato</i> | <i>lativitta</i> | CAM016583 | m | -1.115567  | -77.778333 | Ecuador |
| <i>H. erato</i> | <i>lativitta</i> | CAM016586 | m | -1.115567  | -77.778333 | Ecuador |
| <i>H. erato</i> | <i>lativitta</i> | CAM016973 | f | -1.187817  | -77.831050 | Ecuador |
| <i>H. erato</i> | <i>lativitta</i> | CAM016999 | m | -1.187817  | -77.831050 | Ecuador |
| <i>H. erato</i> | <i>lativitta</i> | CAM017013 | f | -1.091567  | -77.719950 | Ecuador |
| <i>H. erato</i> | <i>lativitta</i> | CAM017027 | m | -1.091567  | -77.719950 | Ecuador |
| <i>H. erato</i> | <i>lativitta</i> | CAM017124 | m | -1.091567  | -77.719950 | Ecuador |
| <i>H. erato</i> | <i>lativitta</i> | CAM017170 | m | -1.061383  | -77.668433 | Ecuador |
| <i>H. erato</i> | <i>lativitta</i> | CAM017395 | f | -1.061383  | -77.668433 | Ecuador |
| <i>H. erato</i> | <i>lativitta</i> | CAM017405 | f | -1.098330  | -77.583890 | Ecuador |
| <i>H. erato</i> | <i>microclea</i> | 10428928  | m | -13.316667 | -71.600000 | Peru    |
| <i>H. erato</i> | <i>microclea</i> | 10428929  | m | -9.883333  | -74.933333 | Peru    |
| <i>H. erato</i> | <i>microclea</i> | 10428930  | m | -12.916667 | -71.400000 | Peru    |
| <i>H. erato</i> | <i>microclea</i> | 10428931  | m | -11.066667 | -75.316667 | Peru    |
| <i>H. erato</i> | <i>microclea</i> | 10428932  | m | -11.050000 | -75.316667 | Peru    |
| <i>H. erato</i> | <i>microclea</i> | 10428934  | m | -10.883333 | -75.283333 | Peru    |
| <i>H. erato</i> | <i>microclea</i> | 10428935  | m | -10.250000 | -74.750000 | Peru    |
| <i>H. erato</i> | <i>microclea</i> | 10428936  | m | -10.883333 | -75.216667 | Peru    |
| <i>H. erato</i> | <i>microclea</i> | 10428937  | m | -11.050000 | -75.316667 | Peru    |
| <i>H. erato</i> | <i>microclea</i> | 10428941  | f | -11.066667 | -75.316667 | Peru    |
| <i>H. erato</i> | <i>notabilis</i> | CAM016057 | m | -1.383017  | -77.944567 | Ecuador |
| <i>H. erato</i> | <i>notabilis</i> | CAM016058 | m | -1.383017  | -77.944567 | Ecuador |
| <i>H. erato</i> | <i>notabilis</i> | CAM016060 | f | -1.383017  | -77.944567 | Ecuador |
| <i>H. erato</i> | <i>notabilis</i> | CAM016067 | m | -1.362283  | -77.959433 | Ecuador |
| <i>H. erato</i> | <i>notabilis</i> | CAM016797 | f | -1.429250  | -77.986650 | Ecuador |
| <i>H. erato</i> | <i>notabilis</i> | CAM016894 | m | -1.437117  | -78.122883 | Ecuador |
| <i>H. erato</i> | <i>notabilis</i> | CAM016900 | m | -1.437117  | -78.122883 | Ecuador |
| <i>H. erato</i> | <i>notabilis</i> | CAM016915 | m | -1.459967  | -78.072800 | Ecuador |
| <i>H. erato</i> | <i>notabilis</i> | CAM017174 | m | -1.367483  | -78.016017 | Ecuador |
| <i>H. erato</i> | <i>notabilis</i> | CAM017177 | m | -1.367483  | -78.016017 | Ecuador |
| <i>H. erato</i> | <i>phyllis</i>   | 10428488  | m | -16.833333 | -63.916667 | Bolivia |
| <i>H. erato</i> | <i>phyllis</i>   | 10428490  | m | -17.250000 | -62.750000 | Bolivia |
| <i>H. erato</i> | <i>phyllis</i>   | 10_MARA   | m | -2.614010  | -44.283920 | Brasil  |
| <i>H. erato</i> | <i>phyllis</i>   | 112_BOQ2  | m | -2.805583  | -43.820889 | Brasil  |
| <i>H. erato</i> | <i>phyllis</i>   | 114_BOQ2  | m | -2.805583  | -43.820889 | Brasil  |
| <i>H. erato</i> | <i>phyllis</i>   | 35_SAG    | m | -2.645028  | -44.140333 | Brasil  |
| <i>H. erato</i> | <i>phyllis</i>   | 49_SAG    | f | -2.645028  | -44.140333 | Brasil  |
| <i>H. erato</i> | <i>phyllis</i>   | 52_SAG    | m | -2.645028  | -44.140333 | Brasil  |

|                     |                  |           |   |            |            |          |
|---------------------|------------------|-----------|---|------------|------------|----------|
| <i>H. erato</i>     | <i>phyllis</i>   | 6_MARA    | m | -2.614010  | -44.283920 | Brasil   |
| <i>H. erato</i>     | <i>phyllis</i>   | 85_IG     | m | -2.756444  | -44.321639 | Brasil   |
| <i>H. erato</i>     | <i>venus</i>     | CS000046  | m | -77.373333 | 3.958333   | Colombia |
| <i>H. erato</i>     | <i>venus</i>     | CS000047  | f | -77.373333 | 3.958333   | Colombia |
| <i>H. erato</i>     | <i>venus</i>     | CS000265  | f | -77.373333 | 3.958333   | Colombia |
| <i>H. erato</i>     | <i>venus</i>     | CS000275  | m | -77.373333 | 3.958333   | Colombia |
| <i>H. erato</i>     | <i>venus</i>     | CS000278  | m | -77.373333 | 3.958333   | Colombia |
| <i>H. erato</i>     | <i>venus</i>     | CS000284  | m | -77.373333 | 3.958333   | Colombia |
| <i>H. erato</i>     | <i>venus</i>     | CS000286  | m | -77.373333 | 3.958333   | Colombia |
| <i>H. erato</i>     | <i>venus</i>     | CS000288  | m | -77.373333 | 3.958333   | Colombia |
| <i>H. erato</i>     | <i>venus</i>     | CS003656  | m | -76.757222 | 3.500833   | Ecuador  |
| <i>H. erato</i>     | <i>venus</i>     | CS003659  | m | -76.757222 | 3.500833   | Ecuador  |
| <i>H. melpomene</i> | <i>agalope</i>   | 10428229  | m | -4.273539  | -79.204614 | Ecuador  |
| <i>H. melpomene</i> | <i>agalope</i>   | 10428230  | m | -4.273539  | -79.204614 | Ecuador  |
| <i>H. melpomene</i> | <i>agalope</i>   | 10428231  | m | -1.583333  | -77.750000 | Ecuador  |
| <i>H. melpomene</i> | <i>agalope</i>   | 10428232  | m | -1.583333  | -77.750000 | Ecuador  |
| <i>H. melpomene</i> | <i>agalope</i>   | 10428233  | m | -1.583333  | -77.750000 | Ecuador  |
| <i>H. melpomene</i> | <i>agalope</i>   | 10428234  | m | -1.583333  | -77.750000 | Ecuador  |
| <i>H. melpomene</i> | <i>agalope</i>   | 10428235  | m | -1.583333  | -77.750000 | Ecuador  |
| <i>H. melpomene</i> | <i>agalope</i>   | 10428238  | f | -1.538392  | -78.067322 | Ecuador  |
| <i>H. melpomene</i> | <i>agalope</i>   | 10428240  | f | -1.066667  | -77.550000 | Ecuador  |
| <i>H. melpomene</i> | <i>agalope</i>   | 10428266  | m | -10.499805 | -75.652458 | Ecuador  |
| <i>H. melpomene</i> | <i>agalope</i>   | 10428267  | m | -13.433333 | -70.383333 | Ecuador  |
| <i>H. melpomene</i> | <i>agalope</i>   | CAM008689 | m | -6.289700  | -76.228900 | Peru     |
| <i>H. melpomene</i> | <i>agalope</i>   | CAM008702 | f | -6.239200  | -76.268700 | Peru     |
| <i>H. melpomene</i> | <i>amaryllis</i> | 10428116  | m | -6.483333  | -76.366667 | Peru     |
| <i>H. melpomene</i> | <i>amaryllis</i> | BC2639    | m | -6.417400  | -77.443290 | Peru     |
| <i>H. melpomene</i> | <i>amaryllis</i> | MJ12.3137 | m | -6.454740  | -76.299440 | Peru     |
| <i>H. melpomene</i> | <i>amaryllis</i> | MJ12.3371 | m | -6.452830  | -76.286215 | Peru     |
| <i>H. melpomene</i> | <i>amaryllis</i> | MJ12.3392 | m | -6.452830  | -76.286215 | Peru     |
| <i>H. melpomene</i> | <i>amaryllis</i> | MJ12.3393 | m | -6.452830  | -76.286215 | Peru     |
| <i>H. melpomene</i> | <i>amaryllis</i> | MJ12.3396 | m | -6.452830  | -76.286215 | Peru     |
| <i>H. melpomene</i> | <i>amaryllis</i> | MJ12.3414 | m | -6.454010  | -76.300230 | Peru     |
| <i>H. melpomene</i> | <i>amaryllis</i> | MJ12.3416 | m | -6.453700  | -76.298070 | Peru     |
| <i>H. melpomene</i> | <i>amaryllis</i> | MJ12.3417 | m | -6.453700  | -76.298070 | Peru     |
| <i>H. melpomene</i> | <i>amaryllis</i> | MJ12.3442 | m | -6.454740  | -76.299440 | Peru     |
| <i>H. melpomene</i> | <i>cythera</i>   | 15N005    | f | 0.175330   | -78.907520 | Ecuador  |
| <i>H. melpomene</i> | <i>cythera</i>   | 15N006    | m | 0.193660   | -78.858700 | Ecuador  |
| <i>H. melpomene</i> | <i>cythera</i>   | 15N009    | m | 0.175330   | -78.907520 | Ecuador  |
| <i>H. melpomene</i> | <i>cythera</i>   | 15N020    | m | 0.184970   | -78.853020 | Ecuador  |
| <i>H. melpomene</i> | <i>cythera</i>   | 15N022    | f | 0.184970   | -78.853020 | Ecuador  |
| <i>H. melpomene</i> | <i>cythera</i>   | 15N023    | m | 0.184970   | -78.853020 | Ecuador  |
| <i>H. melpomene</i> | <i>cythera</i>   | CAM008510 | m | -0.648000  | -78.789500 | Ecuador  |
| <i>H. melpomene</i> | <i>cythera</i>   | CAM040383 | f | 0.212420   | -78.938550 | Ecuador  |

|                     |                     |             |   |           |            |               |
|---------------------|---------------------|-------------|---|-----------|------------|---------------|
| <i>H. melpomene</i> | <i>cythera</i>      | CAM040459   | m | 0.149100  | -78.759070 | Ecuador       |
| <i>H. melpomene</i> | <i>cythera</i>      | CAM040474   | f | 0.153760  | -78.758970 | Ecuador       |
| <i>H. melpomene</i> | <i>ecuadorensis</i> | 10428219    | m | -4.066667 | -78.966667 | Ecuador       |
| <i>H. melpomene</i> | <i>ecuadorensis</i> | 10428220    | m | -1.583333 | -77.750000 | Ecuador       |
| <i>H. melpomene</i> | <i>ecuadorensis</i> | CAM009112   | m | -4.043900 | -78.986100 | Ecuador       |
| <i>H. melpomene</i> | <i>ecuadorensis</i> | CAM009113   | m | -4.043900 | -78.986100 | Ecuador       |
| <i>H. melpomene</i> | <i>ecuadorensis</i> | CAM009114   | m | -4.043900 | -78.986100 | Ecuador       |
| <i>H. melpomene</i> | <i>ecuadorensis</i> | CAM009115   | m | -4.043900 | -78.986100 | Ecuador       |
| <i>H. melpomene</i> | <i>ecuadorensis</i> | CAM009119   | m | -4.043900 | -78.986100 | Ecuador       |
| <i>H. melpomene</i> | <i>ecuadorensis</i> | CAM009120   | m | -4.043900 | -78.986100 | Ecuador       |
| <i>H. melpomene</i> | <i>ecuadorensis</i> | CAM009141   | m | -2.251000 | -78.200000 | Ecuador       |
| <i>H. melpomene</i> | <i>malleti</i>      | CAM016772   | m | -1.251850 | -77.819600 | Ecuador       |
| <i>H. melpomene</i> | <i>malleti</i>      | CAM016224   | f | -1.115567 | -77.778333 | Ecuador       |
| <i>H. melpomene</i> | <i>malleti</i>      | CAM016606   | m | -1.115567 | -77.778333 | Ecuador       |
| <i>H. melpomene</i> | <i>malleti</i>      | CAM016144   | m | -1.416050 | -77.729017 | Ecuador       |
| <i>H. melpomene</i> | <i>malleti</i>      | CAM016267   | m | -1.250967 | -77.698850 | Ecuador       |
| <i>H. melpomene</i> | <i>malleti</i>      | CAM016609   | f | -1.115567 | -77.778333 | Ecuador       |
| <i>H. melpomene</i> | <i>malleti</i>      | CAM016610   | m | -1.115567 | -77.778333 | Ecuador       |
| <i>H. melpomene</i> | <i>malleti</i>      | CAM016611   | m | -1.115567 | -77.778333 | Ecuador       |
| <i>H. melpomene</i> | <i>malleti</i>      | CAM017049   | m | -1.168350 | -77.781117 | Ecuador       |
| <i>H. melpomene</i> | <i>malleti</i>      | CAM017064   | m | -1.168350 | -77.781117 | Ecuador       |
| <i>H. melpomene</i> | <i>malleti</i>      | CAM017070   | m | -1.168350 | -77.781117 | Ecuador       |
| <i>H. melpomene</i> | <i>melpomene</i>    | 10428369    | f | 5.500000  | -54.033300 | French Guiana |
| <i>H. melpomene</i> | <i>melpomene</i>    | 10428371    | f | 5.400000  | -54.083300 | French Guiana |
| <i>H. melpomene</i> | <i>melpomene</i>    | CAM000413   | m | 4.913800  | -52.359500 | French Guiana |
| <i>H. melpomene</i> | <i>melpomene</i>    | CAM001422   | m | 4.963200  | -52.420000 | French Guiana |
| <i>H. melpomene</i> | <i>melpomene</i>    | CAM008171   | f | 4.963200  | -52.420000 | French Guiana |
| <i>H. melpomene</i> | <i>melpomene</i>    | CAM008215   | m | 4.789000  | -52.404000 | French Guiana |
| <i>H. melpomene</i> | <i>melpomene</i>    | CAM008218   | m | 4.963200  | -52.420000 | French Guiana |
| <i>H. melpomene</i> | <i>melpomene</i>    | CAM008863   | m | 7.756800  | -77.684100 | Panama        |
| <i>H. melpomene</i> | <i>melpomene</i>    | CAM008887   | m | 7.756800  | -77.684100 | Panama        |
| <i>H. melpomene</i> | <i>melpomene</i>    | CAM008888   | m | 7.756800  | -77.684100 | Panama        |
| <i>H. melpomene</i> | <i>melpomene</i>    | CAM008954   | m | 7.636200  | -78.189700 | Panama        |
| <i>H. melpomene</i> | <i>melpomene</i>    | CAM008955   | m | 7.636200  | -78.189700 | Panama        |
| <i>H. melpomene</i> | <i>melpomene</i>    | CAM008956   | m | 7.636200  | -78.189700 | Panama        |
| <i>H. melpomene</i> | <i>melpomene</i>    | CAM008957   | m | 7.636200  | -78.189700 | Panama        |
| <i>H. melpomene</i> | <i>melpomene</i>    | CAM008979   | m | 7.636200  | -78.189700 | Panama        |
| <i>H. melpomene</i> | <i>melpomene</i>    | CAM009316   | m | 4.963200  | -52.420000 | French Guiana |
| <i>H. melpomene</i> | <i>melpomene</i>    | CAM009317   | m | 4.963200  | -52.420000 | French Guiana |
| <i>H. melpomene</i> | <i>meriana</i>      | 13715       | m | 3.688300  | -54.082500 | Suriname      |
| <i>H. melpomene</i> | <i>meriana</i>      | melp_14-103 | m | 5.113892  | -54.990106 | Suriname      |
| <i>H. melpomene</i> | <i>meriana</i>      | melp_14-108 | m | 5.113892  | -54.990106 | Suriname      |
| <i>H. melpomene</i> | <i>meriana</i>      | melp_14-110 | m | 5.113892  | -54.990106 | Suriname      |
| <i>H. melpomene</i> | <i>meriana</i>      | melp_14-111 | m | 5.113892  | -54.990106 | Suriname      |

|                     |                   |             |   |            |            |               |
|---------------------|-------------------|-------------|---|------------|------------|---------------|
| <i>H. melpomene</i> | <i>meriana</i>    | melp_14-122 | m | 5.113892   | -54.990106 | Suriname      |
| <i>H. melpomene</i> | <i>meriana</i>    | melp_14-133 | f | 5.113892   | -54.990106 | Suriname      |
| <i>H. melpomene</i> | <i>meriana</i>    | melp_14-138 | f | 5.113892   | -54.990106 | Suriname      |
| <i>H. melpomene</i> | <i>nanna</i>      | LMCI_105-62 | m | -19.059167 | -40.139722 | Brasil        |
| <i>H. melpomene</i> | <i>nanna</i>      | LMCI_105-63 | m | -19.059167 | -40.139722 | Brasil        |
| <i>H. melpomene</i> | <i>nanna</i>      | LMCI_105-64 | f | -19.059167 | -40.139722 | Brasil        |
| <i>H. melpomene</i> | <i>nanna</i>      | LMCI_183-10 | m | -3.754444  | -40.910278 | Brasil        |
| <i>H. melpomene</i> | <i>nanna</i>      | LMCI_183-11 | m | -3.754444  | -40.910278 | Brasil        |
| <i>H. melpomene</i> | <i>nanna</i>      | LMCI_183-14 | m | -3.754444  | -40.910278 | Brasil        |
| <i>H. melpomene</i> | <i>nanna</i>      | LMCI_183-15 | m | -3.754444  | -40.910278 | Brasil        |
| <i>H. melpomene</i> | <i>nanna</i>      | LMCI_183-16 | m | -3.754444  | -40.910278 | Brasil        |
| <i>H. melpomene</i> | <i>nanna</i>      | LMCI_183-18 | f | -3.754444  | -40.910278 | Brasil        |
| <i>H. melpomene</i> | <i>nanna</i>      | LMCI_183-19 | m | -3.754444  | -40.910278 | Brasil        |
| <i>H. melpomene</i> | <i>plesseni</i>   | CAM016347   | f | -1.425867  | -78.018200 | Ecuador       |
| <i>H. melpomene</i> | <i>plesseni</i>   | CAM016349   | f | -1.425867  | -78.018200 | Ecuador       |
| <i>H. melpomene</i> | <i>plesseni</i>   | CAM016354   | m | -1.425867  | -78.018200 | Ecuador       |
| <i>H. melpomene</i> | <i>plesseni</i>   | CAM016355   | m | -1.425867  | -78.018200 | Ecuador       |
| <i>H. melpomene</i> | <i>plesseni</i>   | CAM016378   | m | -1.425867  | -78.018200 | Ecuador       |
| <i>H. melpomene</i> | <i>plesseni</i>   | CAM016810   | f | -1.409933  | -77.915350 | Ecuador       |
| <i>H. melpomene</i> | <i>plesseni</i>   | CAM017185   | m | -1.367483  | -78.016017 | Ecuador       |
| <i>H. melpomene</i> | <i>plesseni</i>   | CAM017186   | f | -1.367483  | -78.016017 | Ecuador       |
| <i>H. melpomene</i> | <i>plesseni</i>   | CAM017187   | f | -1.367483  | -78.016017 | Ecuador       |
| <i>H. melpomene</i> | <i>plesseni</i>   | CAM017614   | m | -1.422417  | -78.172933 | Ecuador       |
| <i>H. melpomene</i> | <i>rosina</i>     | CAM000903   | f | 9.129900   | -79.715800 | Panama        |
| <i>H. melpomene</i> | <i>rosina</i>     | CAM000947   | m | 9.129900   | -79.715800 | Panama        |
| <i>H. melpomene</i> | <i>rosina</i>     | CAM001015   | m | 9.116000   | -79.698000 | Panama        |
| <i>H. melpomene</i> | <i>rosina</i>     | CAM001027   | m | 9.076000   | -79.659000 | Panama        |
| <i>H. melpomene</i> | <i>rosina</i>     | CAM001067   | m | 9.010900   | -79.547700 | Panama        |
| <i>H. melpomene</i> | <i>rosina</i>     | CAM001137   | f | 9.122200   | -79.714900 | Panama        |
| <i>H. melpomene</i> | <i>rosina</i>     | CAM001391   | f | 9.122200   | -79.714900 | Panama        |
| <i>H. melpomene</i> | <i>rosina</i>     | CAM002901   | m | NA         | NA         | Panama        |
| <i>H. melpomene</i> | <i>rosina</i>     | CAM008052   | m | 8.981000   | -82.240000 | Panama        |
| <i>H. melpomene</i> | <i>rosina</i>     | CAM009554   | m | 8.975800   | -78.375300 | Panama        |
| <i>H. melpomene</i> | <i>thelxiopea</i> | 10428329    | m | 5.250000   | -54.250000 | French Guiana |
| <i>H. melpomene</i> | <i>thelxiopea</i> | 10428331    | f | 5.400000   | -54.083333 | French Guiana |
| <i>H. melpomene</i> | <i>thelxiopea</i> | 10428332    | f | 5.400000   | -54.083333 | French Guiana |
| <i>H. melpomene</i> | <i>thelxiopea</i> | 10428333    | m | 5.400000   | -54.083333 | French Guiana |
| <i>H. melpomene</i> | <i>thelxiopea</i> | 10428334    | m | 5.400000   | -54.083333 | French Guiana |
| <i>H. melpomene</i> | <i>thelxiopea</i> | 10428335    | f | 5.400000   | -54.083333 | French Guiana |
| <i>H. melpomene</i> | <i>thelxiopea</i> | 10428336    | f | 5.400000   | -54.083333 | French Guiana |
| <i>H. melpomene</i> | <i>thelxiopea</i> | 10428337    | m | 5.400000   | -54.083333 | French Guiana |
| <i>H. melpomene</i> | <i>thelxiopea</i> | 10428338    | m | 5.250000   | -54.250000 | French Guiana |
| <i>H. melpomene</i> | <i>thelxiopea</i> | 10428339    | m | 5.500000   | -54.033333 | French Guiana |
| <i>H. melpomene</i> | <i>thelxiopea</i> | 10428340    | f | 5.400000   | -54.083333 | French Guiana |

|                     |                   |           |   |            |            |               |
|---------------------|-------------------|-----------|---|------------|------------|---------------|
| <i>H. melpomene</i> | <i>thelxiopea</i> | 10428341  | f | 5.250000   | -54.250000 | French Guiana |
| <i>H. melpomene</i> | <i>thelxiopea</i> | 10428342  | f | 5.516667   | -53.966667 | French Guiana |
| <i>H. melpomene</i> | <i>thelxiopea</i> | 10428343  | m | 5.500000   | -54.033333 | French Guiana |
| <i>H. melpomene</i> | <i>vulcanus</i>   | CAM000058 | m | 3.777900   | -76.130000 | Colombia      |
| <i>H. melpomene</i> | <i>vulcanus</i>   | CAM000059 | m | 3.782500   | -76.721100 | Colombia      |
| <i>H. melpomene</i> | <i>vulcanus</i>   | CAM000060 | m | 3.782500   | -76.721100 | Colombia      |
| <i>H. melpomene</i> | <i>vulcanus</i>   | CAM000061 | m | 3.782500   | -76.721100 | Colombia      |
| <i>H. melpomene</i> | <i>vulcanus</i>   | CAM000062 | m | 3.782500   | -76.721100 | Colombia      |
| <i>H. melpomene</i> | <i>vulcanus</i>   | CAM000063 | m | 3.782500   | -76.721100 | Colombia      |
| <i>H. melpomene</i> | <i>vulcanus</i>   | CAM000064 | m | 3.782500   | -76.721100 | Colombia      |
| <i>H. melpomene</i> | <i>vulcanus</i>   | CAM000129 | m | 3.895800   | -76.621400 | Colombia      |
| <i>H. melpomene</i> | <i>vulcanus</i>   | CAM000132 | m | 3.895800   | -76.621400 | Colombia      |
| <i>H. melpomene</i> | <i>vulcanus</i>   | CAM000134 | m | 3.895800   | -76.621400 | Colombia      |
| <i>H. melpomene</i> | <i>xenoclea</i>   | MJ12.3605 | m | -11.174530 | -75.403470 | Peru          |
| <i>H. melpomene</i> | <i>xenoclea</i>   | MJ12.3606 | m | -11.174530 | -75.403470 | Peru          |
| <i>H. melpomene</i> | <i>xenoclea</i>   | MJ12.3608 | m | -11.174530 | -75.403470 | Peru          |
| <i>H. melpomene</i> | <i>xenoclea</i>   | MJ12.3636 | m | -11.033770 | -75.409130 | Peru          |
| <i>H. melpomene</i> | <i>xenoclea</i>   | MJ12.3638 | m | -11.036420 | -75.407990 | Peru          |
| <i>H. melpomene</i> | <i>xenoclea</i>   | MJ12.3647 | m | -11.044580 | -75.413270 | Peru          |
| <i>H. melpomene</i> | <i>xenoclea</i>   | MJ12.3648 | m | -11.033770 | -75.409130 | Peru          |
| <i>H. melpomene</i> | <i>xenoclea</i>   | MJ12.3651 | m | -11.033770 | -75.409130 | Peru          |
| <i>H. melpomene</i> | <i>xenoclea</i>   | MJ12.3653 | m | -11.033770 | -75.409130 | Peru          |
