# Supplementary material for: Perfect mimicry between Heliconius butterflies is constrained by genetics and development
Source: PubMed Central journal article supplement (PMC7423669; doi:10.1098/rspb.2020.1267), 2020-07-22
Supplement: rspb20201267supp7.pdf [file rspb20201267supp7.pdf]

**Table S 3. MANOVA and LDA results for shape variation in the forewing of *H. erato* and *H. melpomene*. (A) MANOVA and LDA results including all 18 landmarks. (B) MANOVA and LDA results including subset of landmarks. Only the scores of samples along significant PC axes were used as determined by permutation.**

| A. All 18 landmarks                        |        |        |       |           |                    |      |
|--------------------------------------------|--------|--------|-------|-----------|--------------------|------|
| Permutation (Jackstraw): N significant PCs |        |        |       |           |                    | 6.00 |
|                                            | Pillai | F      | DF    | p         |                    |      |
| Manova PC 1-6 ~ species                    | 0.66   | 86.60  | 1,280 | < 2.2e-16 |                    |      |
| Manova PC 1-6 ~ sex                        | 0.24   | 14.41  | 1,280 | 2.86E-14  |                    |      |
| Manova PC 1-6 ~ species*sex                | 0.04   | 1.68   | 1,280 | 0.1271    |                    |      |
| Manova each PC ~ species                   | Pillai | F      | DF    | p         | variance explained |      |
| PC1                                        |        | 84.96  | 1,280 | 7.91E-18  | 0.23               |      |
| PC2                                        |        | 134.95 | 1,280 | 1.11E-25  | 0.17               |      |
| PC3                                        |        | 12.40  | 1,280 | 5.03E-04  | 0.09               |      |
| PC4                                        |        | 3.53   | 1,280 | 6.14E-02  | 0.07               |      |
| PC5                                        |        | 5.31   | 1,280 | 2.19E-02  | 0.07               |      |
| PC6                                        |        | 15.69  | 1,280 | 9.51E-05  | 0.06               |      |
| Manova each PC ~ sex                       | Pillai | F      | DF    | p         | variance explained |      |
| PC1                                        |        | 33.06  | 1,280 | 2.36E-08  | 0.23               |      |
| PC2                                        |        | 18.18  | 1,280 | 2.76E-05  | 0.17               |      |
| PC3                                        |        | 0.67   | 1,280 | 4.15E-01  | 0.09               |      |
| PC4                                        |        | 0.48   | 1,280 | 4.87E-01  | 0.07               |      |
| PC5                                        |        | 30.59  | 1,280 | 7.37E-08  | 0.07               |      |
| PC6                                        |        | 1.57   | 1,280 | 2.11E-01  | 0.06               |      |

| LDA classification ~ species |           |
|------------------------------|-----------|
| Species                      | posterior |
| <i>H. erato</i>              | 94.29     |
| <i>H. melpomene</i>          | 87.23     |

| LDA classification ~ sex |           |
|--------------------------|-----------|
| Sex                      | posterior |
| male                     | 74.65     |
| female                   | 67.65     |

| B. Subset landmarks                        |        |       |       |          |                    |      |
|--------------------------------------------|--------|-------|-------|----------|--------------------|------|
| Permutation (Jackstraw): N significant PCs |        |       |       |          |                    | 5.00 |
|                                            | Pillai | F     | DF    | p        |                    |      |
| Manova PC 1-6 ~ species                    | 0.22   | 15.49 | 1,280 | 2.07E-13 |                    |      |
| Manova PC 1-6 ~ sex                        | 0.20   | 13.95 | 1,280 | 3.77E-12 |                    |      |
| Manova PC 1-6 ~ species*sex                | 0.02   | 1.36  | 1,280 | 0.238    |                    |      |
| Manova each PC ~ species                   | Pillai | F     | DF    | p        | variance explained |      |
| PC1                                        |        | 9.32  | 1,280 | 2.49E-03 | 0.23               |      |
| PC2                                        |        | 45.03 | 1,280 | 1.09E-10 | 0.19               |      |
| PC3                                        |        | 9.46  | 1,280 | 2.32E-03 | 0.15               |      |
| PC4                                        |        | 2.36  | 1,280 | 1.26E-01 | 0.10               |      |
| PC5                                        |        | 0.02  | 1,280 | 9.01E-01 | 0.08               |      |
| Manova each PC ~ sex                       | Pillai | F     | DF    | p        | variance explained |      |
| PC1                                        |        | 45.25 | 1,280 | 9.90E-11 | 0.23               |      |
| PC2                                        |        | 0.00  | 1,280 | 9.53E-01 | 0.19               |      |
| PC3                                        |        | 12.12 | 1,280 | 5.80E-04 | 0.15               |      |
| PC4                                        |        | 0.48  | 1,280 | 4.90E-01 | 0.10               |      |
| PC5                                        |        | 3.33  | 1,280 | 6.91E-02 | 0.08               |      |

| LDA classification ~ species |           |
|------------------------------|-----------|
| Species                      | posterior |
| <i>H. erato</i>              | 61.43     |
| <i>H. melpomene</i>          | 68.09     |

| LDA classification ~ sex |           |
|--------------------------|-----------|
| Sex                      | posterior |
| male                     | 67.61     |
| female                   | 63.24     |
