# Supplementary material for: Perfect mimicry between Heliconius butterflies is constrained by genetics and development
Source: PubMed Central journal article supplement (PMC7423669; doi:10.1098/rspb.2020.1267), 2020-07-22
Supplement: rspb20201267supp8.pdf [file rspb20201267supp8.pdf]

**Table S 4. MANOVA and LDA results for mid-forewing band (MFB) shape variation in *H. erato* and *H. melpomene* using the subset of landmarks. (A) MANOVA and LDA for *H. erato*. (B) MANOVA and LDA for *H. melpomene*. (C) MANOVA and LDA for *H. erato* and *H. melpomene* combined. (D) MANOVA and LDA for *H. erato* and *H. melpomene* Postman races combined. Only the scores of samples along significant PC axes were used as determined by permutation.**

| A. Subset landmarks             |                                            | PCA <i>H. erato</i> |        |           |                    |
|---------------------------------|--------------------------------------------|---------------------|--------|-----------|--------------------|
|                                 | Permutation (Jackstraw): N significant PCs |                     |        |           | 10.00              |
|                                 |                                            | F                   | DF     | p         |                    |
| Manova PC 1-10 ~ population     |                                            | 35.39               | 13,139 | < 2.2e-16 |                    |
| Manova PC 1-10 ~ sex            |                                            | 3.11                | 1,139  | 0.00168   |                    |
| Manova PC 1-10 ~ population*sex |                                            | 1.24                | 13,139 | 0.04399   |                    |
| Manova each PC ~ population     |                                            | F                   | DF     | p         | variance explained |
| PC1                             |                                            | 575.39              | 13,139 | 5.14E-96  | 0.33               |
| PC2                             |                                            | 172.97              | 13,139 | 1.10E-67  | 0.20               |
| PC3                             |                                            | 60.12               | 13,139 | 2.95E-44  | 0.07               |
| PC4                             |                                            | 121.26              | 13,139 | 1.40E-59  | 0.05               |
| PC5                             |                                            | 98.84               | 13,139 | 5.26E-55  | 0.03               |
| PC6                             |                                            | 40.07               | 13,139 | 5.17E-36  | 0.03               |
| PC7                             |                                            | 56.97               | 13,139 | 3.94E-43  | 0.02               |
| PC8                             |                                            | 28.40               | 13,139 | 1.65E-29  | 0.01               |
| PC9                             |                                            | 7.56                | 13,139 | 1.57E-10  | 0.01               |
| PC10                            |                                            | 8.33                | 13,139 | 1.54E-11  | 0.01               |
| Manova each PC ~ sex            |                                            | F                   | DF     | p         | variance explained |
| PC1                             |                                            | 1.39                | 1,139  | 2.41E-01  | 0.33               |
| PC2                             |                                            | 0.03                | 1,139  | 8.52E-01  | 0.20               |
| PC3                             |                                            | 2.01                | 1,139  | 1.59E-01  | 0.07               |
| PC4                             |                                            | 0.58                | 1,139  | 4.49E-01  | 0.05               |
| PC5                             |                                            | 3.17                | 1,139  | 7.76E-02  | 0.03               |
| PC6                             |                                            | 7.50                | 1,139  | 7.19E-03  | 0.03               |
| PC7                             |                                            | 1.99                | 1,139  | 1.61E-01  | 0.02               |
| PC8                             |                                            | 9.98                | 1,139  | 2.04E-03  | 0.01               |
| PC9                             |                                            | 1.46                | 1,139  | 2.30E-01  | 0.01               |
| PC10                            |                                            | 9.03                | 1,139  | 3.28E-03  | 0.01               |

| LDA classification ~ populations    |           |
|-------------------------------------|-----------|
| Population                          | posterior |
| <i>H. e. hydara</i> (Panama)        | 60        |
| <i>H. e. hydara</i> (French Guiana) | 90        |
| <i>H. e. demophoon</i>              | 54.55     |
| <i>H. e. venus</i>                  | 90        |
| <i>H. e. cyrba</i>                  | 100       |
| <i>H. e. lativitta</i>              | 80        |
| <i>H. e. emma</i>                   | 90        |
| <i>H. e. notabilis</i>              | 100       |
| <i>H. e. etylus</i>                 | 100       |
| <i>H. e. favorinus</i>              | 66.67     |
| <i>H. e. phyllis</i>                | 90        |
| <i>H. e. amalfreda</i>              | 60        |
| <i>H. e. erato</i>                  | 60        |
| <i>H. e. microclea</i>              | 100       |

| LDA classification ~ populations |           |
|----------------------------------|-----------|
| Sex                              | posterior |
| male                             | 55.77     |
| female                           | 58.33     |

| B. Subset landmarks                        |        | PCA <i>H. melpomene</i> |           |                    |
|--------------------------------------------|--------|-------------------------|-----------|--------------------|
| Permutation (Jackstraw): N significant PCs |        | 11.00                   |           |                    |
|                                            | F      | DF                      | p         |                    |
| Manova PC 1-11 ~ population                | 19.73  | 13,140                  | < 2.2e-16 |                    |
| Manova PC 1-11 ~ sex                       | 3.17   | 1,140                   | 0.00103   |                    |
| Manova PC 1-11 ~ population*sex            | 1.27   | 8,140                   | 0.05324   |                    |
| Manova each PC ~ population                | F      | DF                      | p         | variance explained |
| PC1                                        | 603.97 | 13,140                  | 8.67E-96  | 0.36               |
| PC2                                        | 238.15 | 13,140                  | 4.13E-74  | 0.18               |
| PC3                                        | 44.28  | 13,140                  | 1.35E-37  | 0.08               |
| PC4                                        | 56.07  | 13,140                  | 2.47E-42  | 0.04               |
| PC5                                        | 35.73  | 13,140                  | 1.85E-33  | 0.02               |
| PC6                                        | 45.37  | 13,140                  | 4.48E-38  | 0.02               |
| PC7                                        | 15.15  | 13,140                  | 5.07E-19  | 0.02               |
| PC8                                        | 8.43   | 13,140                  | 1.33E-11  | 0.01               |
| PC9                                        | 13.28  | 13,140                  | 3.61E-17  | 0.01               |
| PC10                                       | 8.22   | 13,140                  | 2.48E-11  | 0.01               |
| PC11                                       | 1.36   | 13,140                  | 1.92E-01  | 0.01               |
| Manova each PC ~ sex                       | F      | DF                      | p         | variance explained |
| PC1                                        | 0.84   | 1,140                   | 3.61E-01  | 0.36               |
| PC2                                        | 0.00   | 1,140                   | 9.56E-01  | 0.18               |
| PC3                                        | 1.59   | 1,140                   | 2.10E-01  | 0.08               |
| PC4                                        | 0.77   | 1,140                   | 3.81E-01  | 0.04               |
| PC5                                        | 0.02   | 1,140                   | 8.94E-01  | 0.02               |
| PC6                                        | 4.88   | 1,140                   | 2.91E-02  | 0.02               |
| PC7                                        | 2.13   | 1,140                   | 1.47E-01  | 0.02               |
| PC8                                        | 1.69   | 1,140                   | 1.96E-01  | 0.01               |
| PC9                                        | 2.10   | 1,140                   | 1.50E-01  | 0.01               |
| PC10                                       | 20.92  | 1,140                   | 1.19E-05  | 0.01               |
| PC11                                       | 6.05   | 1,140                   | 1.54E-02  | 0.01               |

| LDA classification ~ populations   |           |
|------------------------------------|-----------|
| Population                         | posterior |
| <i>H. m. melpomene</i> (Panama)    | 25        |
| <i>H. m. melpomene</i> (F. Guiana) | 88.89     |
| <i>H. m. rosina</i>                | 40        |
| <i>H. m. vulcanus</i>              | 10        |
| <i>H. m. cythera</i>               | 100       |
| <i>H. m. malleti</i>               | 90.91     |
| <i>H. m. aglaope</i>               | 76.92     |
| <i>H. m. plesseni</i>              | 100       |
| <i>H. m. ecuadorensis</i>          | 100       |
| <i>H. m. amaryllis</i>             | 63.64     |
| <i>H. m. nanna</i>                 | 100       |
| <i>H. m. meriana</i>               | 75        |
| <i>H. m. thelxiopeia</i>           | 85.71     |
| <i>H. m. xenoclea</i>              | 100       |

| LDA classification ~ populations |           |
|----------------------------------|-----------|
| Sex                              | posterior |
| male                             | 77.98     |
| female                           | 62.5      |

| C. Subset landmarks                        |        | PCA H. erato + H. melpomene |           |                    |  |
|--------------------------------------------|--------|-----------------------------|-----------|--------------------|--|
| Permutation (Jackstraw): N significant PCs |        | 18.00                       |           |                    |  |
|                                            | F      | DF                          | p         |                    |  |
| Manova PC 1-18 ~ population                | 18.01  | 26,280                      | < 2.2e-16 |                    |  |
| Manova PC 1-18 ~ species                   | 70.77  | 1,280                       | < 2.2e-16 |                    |  |
| Manova each PC ~species                    | F      | DF                          | p         | variance explained |  |
| PC1                                        | 61.57  | 1,280                       | 1.21E-13  | 0.32               |  |
| PC2                                        | 73.32  | 1,280                       | 1.09E-15  | 0.19               |  |
| PC3                                        | 1.74   | 1,280                       | 1.88E-01  | 0.07               |  |
| PC4                                        | 0.22   | 1,280                       | 6.42E-01  | 0.04               |  |
| PC5                                        | 300.78 | 1,280                       | 6.21E-45  | 0.03               |  |
| PC6                                        | 218.69 | 1,280                       | 4.38E-36  | 0.03               |  |
| PC7                                        | 14.78  | 1,280                       | 1.53E-04  | 0.02               |  |
| PC8                                        | 84.12  | 1,280                       | 1.68E-17  | 0.02               |  |
| PC9                                        | 141.21 | 1,280                       | 3.59E-26  | 0.01               |  |
| PC10                                       | 29.54  | 1,280                       | 1.29E-07  | 0.01               |  |
| PC11                                       | 10.30  | 1,280                       | 1.50E-03  | 0.01               |  |
| PC12                                       | 11.28  | 1,280                       | 9.04E-04  | 0.01               |  |
| PC13                                       | 9.78   | 1,280                       | 1.97E-03  | 0.01               |  |
| PC14                                       | 30.50  | 1,280                       | 8.28E-08  | 0.01               |  |
| PC15                                       | 0.10   | 1,280                       | 7.58E-01  | 0.01               |  |
| PC16                                       | 0.37   | 1,280                       | 5.43E-01  | 0.01               |  |
| PC17                                       | 0.19   | 1,280                       | 6.64E-01  | 0.00               |  |
| PC18                                       | 0.16   | 1,280                       | 6.94E-01  | 0.00               |  |

| LDA classification ~ species |           |
|------------------------------|-----------|
| Species                      | posterior |
| <i>H. erato</i>              | 88.57     |
| <i>H. melpomene</i>          | 92.2      |

| D. Subset landmarks                        |        | PCA H. erato + H. melpomene<br>Postman |           |                    |  |
|--------------------------------------------|--------|----------------------------------------|-----------|--------------------|--|
| Permutation (Jackstraw): N significant PCs |        | 15.00                                  |           |                    |  |
|                                            | F      | DF                                     | p         |                    |  |
| Manova PC 1-18 ~ population                | 6.25   | 10,127                                 | < 2.2e-16 |                    |  |
| Manova PC 1-18 ~ species                   | 70.02  | 1,127                                  | < 2.2e-16 |                    |  |
| Manova each PC ~species                    | F      | DF                                     | p         | variance explained |  |
| PC1                                        | 14.55  | 1,127                                  | 2.30E-04  | 0.26               |  |
| PC2                                        | 131.01 | 1,127                                  | 3.11E-20  | 0.10               |  |
| PC3                                        | 184.05 | 1,127                                  | 6.53E-25  | 0.08               |  |
| PC4                                        | 23.81  | 1,127                                  | 3.77E-06  | 0.05               |  |
| PC5                                        | 0.01   | 1,127                                  | 9.37E-01  | 0.03               |  |
| PC6                                        | 5.81   | 1,127                                  | 1.77E-02  | 0.02               |  |
| PC7                                        | 0.03   | 1,127                                  | 8.67E-01  | 0.02               |  |
| PC8                                        | 2.56   | 1,127                                  | 1.13E-01  | 0.02               |  |
| PC9                                        | 0.49   | 1,127                                  | 4.86E-01  | 0.02               |  |
| PC10                                       | 2.22   | 1,127                                  | 1.39E-01  | 0.02               |  |
| PC11                                       | 0.44   | 1,127                                  | 5.09E-01  | 0.01               |  |
| PC12                                       | 0.69   | 1,127                                  | 4.10E-01  | 0.01               |  |
| PC13                                       | 1.93   | 1,127                                  | 1.67E-01  | 0.01               |  |
| PC14                                       | 1.31   | 1,127                                  | 2.54E-01  | 0.01               |  |
| PC15                                       | 0.32   | 1,127                                  | 5.72E-01  | 0.01               |  |

| LDA classification ~ species |           |
|------------------------------|-----------|
| Species                      | posterior |
| <i>H. erato</i>              | 100       |
| <i>H. melpomene</i>          | 98.3      |
